# Supplementary material for: Surface charge effects on optical trapping of nanometer-sized lipid vesicles
Source: Royal Society of Chemistry journal article supplement (doi:10.1039/c4sm01007h), 2014-07-28
Supplement: c4sm01007h1.pdf [file c4sm01007h1.pdf]

## Supporting Information for:

# Surface Charge Effects on Optical Trapping of Nanometer-Sized Lipid Vesicles

Seongmin Park<sup>1</sup>, Siyoung Q. Choi<sup>2</sup>, Chaeyeon Song<sup>3</sup>, Mahn Won Kim<sup>1,4\*</sup>, and Myung Chul Choi<sup>3\*</sup>

<sup>1</sup>Department of Physics; <sup>2</sup>Information Electrical Research Institute; <sup>3</sup>Department of Bio and Brain Engineering, KAIST 305-701 Korea; <sup>4</sup>GIST College, GIST 500-712 Korea

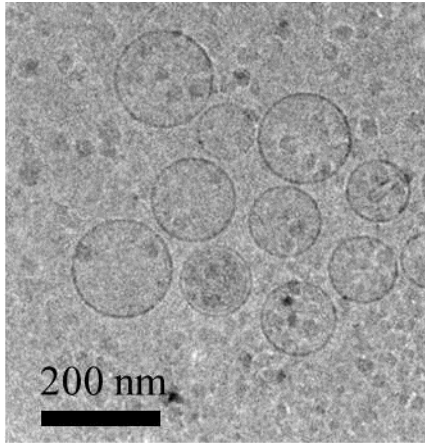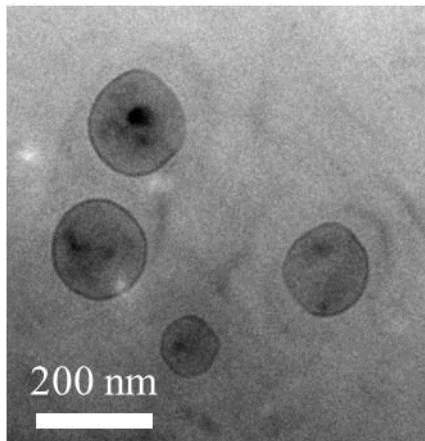

**Fig. S1.** Cryo-TEM images of lipid vesicles of  $\gamma = N_{\text{DOPG}} / (N_{\text{DOPG}} + N_{\text{DOPC}}) = 0.5$  (up) and  $\gamma = 1.0$  (down)

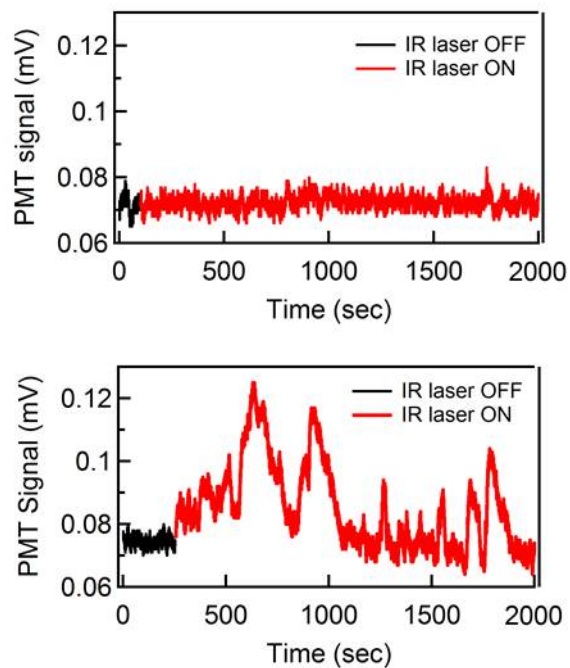

**Fig. S2.** Fluorescence intensity of DOPC only  $\gamma = 0.0$  measured by photomultiplier tube at IR laser power 3 mW (up) and 21 mW (down).
